# Supplementary material
Source: PubMed Central journal article supplement (PMC4033668)
Supplement: NIHMS386390-supplement-1.pdf [file NIHMS386390-supplement-1.pdf]

***TGFB2* loss of function mutations cause familial thoracic aortic aneurysms and acute aortic dissections associated with mild systemic features of the Marfan syndrome**

Catherine Boileau<sup>1,2,3,4,14</sup>, Dong-Chuan Guo<sup>5,14</sup>, Nadine Hanna<sup>1,2,3</sup>, Ellen S. Regalado<sup>5</sup>, Delphine Detaint<sup>1,2,6</sup>, Limin Gong<sup>5</sup>, Mathilde Varret<sup>1</sup>, Siddharth Prakash<sup>5</sup>, Alexander H. Li<sup>5</sup>, Hyacintha d'Indy<sup>1,3</sup>, Alan C. Braverman<sup>7</sup>, Bernard Grandchamp<sup>2,8</sup>, Callie S. Kwartler<sup>5</sup>, Laurent Gouya<sup>2,3,4</sup>, Regie Lyn P. Santos-Cortez<sup>9</sup>, Marianne Abifadel<sup>1</sup>, Suzanne M. Leal<sup>9</sup>, Christine Muti<sup>2</sup>, Jay Shendure<sup>10</sup>, Marie-Sylvie Gross<sup>1</sup>, Mark J. Rieder<sup>10</sup>, Alec Vahanian<sup>6,8</sup>, Deborah A. Nickerson<sup>10</sup>, Jean Baptiste Michel<sup>1</sup>, National Heart Lung and Blood Institute (NHLBI) Go Exome Sequencing Project<sup>11</sup>, Guillaume Jondeau<sup>1,2,6,8,14</sup>, Dianna M. Milewicz<sup>5,11,12,14</sup>

<sup>1</sup> Institut National de la Santé et de la Recherche Médicale (INSERM) U698, Hôpital Bichat, Paris France ; <sup>2</sup>Assistance Publique-Hôpitaux de Paris (AP-HP), Hôpital Bichat, Centre National de Référence pour les syndromes de Marfan et apparentés, Service de Cardiologie, Paris, France; <sup>3</sup>AP-HP, Ambroise Paré, Service de Biochimie d'Hormonologie et de Génétique moléculaire, Boulogne, France ; <sup>4</sup> Université Versailles SQY, Guyancourt, France ; <sup>5</sup>Department of Internal Medicine, University of Texas Health Science Center at Houston, Houston, Texas, USA; <sup>6</sup> AP-HP, service de Cardiologie, Hopital Bichat, Paris, France; <sup>7</sup>Department of Internal Medicine, Washington University School of Medicine, St. Louis, Missouri, USA; <sup>8</sup> UFR de Médecine, Université Paris 7, Paris, France ; <sup>9</sup>Department of Molecular and Human Genetics, Baylor College of Medicine, Houston, Texas, USA; <sup>10</sup>Department of Genome Sciences, University of Washington, Seattle, Washington, USA; <sup>11</sup>Exome Sequencing Project Banner available in the supplementary materials; <sup>12</sup>Memorial Hermann Heart and Vascular Institute, Houston, Texas, USA; <sup>13</sup>Texas Heart Institute at St. Luke's Episcopal Hospital, Houston, Texas, USA. <sup>14</sup>These authors contributed equally to this work. <sup>15</sup>These authors jointly directed this work.

Correspondence should be addresses to D.M.M. (Dianna.M.Milewicz@uth.tmc.edu) or C.B. ([catherine.boileau@inserm.fr](mailto:catherine.boileau@inserm.fr)).

## **NHLBI GO Exome Sequencing Project Members**

### **BroadGO**

Stacey B. Gabriel (Broad Institute), David M. Altshuler (Broad Institute, Harvard Medical School, Massachusetts General Hospital), Gonçalo R. Abecasis (University of Michigan), Hooman Allayee (University of Southern California), Sharon Cresci (Washington University School of Medicine), Mark J. Daly (Broad Institute, Massachusetts General Hospital), Paul I. W. de Bakker (Broad Institute, Harvard Medical School, University Medical Center Utrecht), Mark A. Depristo (Broad Institute), Ron Do (Broad Institute), Peter Donnelly (University of Oxford), Deborah N. Farlow (Broad Institute), Tim Fennell (Broad Institute), Kiran Garimella (University of Oxford), Stanley L. Hazen (Cleveland Clinic), Youna Hu (University of Michigan), Daniel M. Jordan (Harvard Medical School, Harvard University), Goo Jun (University of Michigan), Sekar Kathiresan (Broad Institute, Harvard Medical School, Massachusetts General Hospital), Hyun Min Kang (University of Michigan), Adam Kiezun (Broad Institute), Guillaume Lettre (Broad Institute, Montreal Heart Institute, Université de Montréal), Bingshan Li (University of Michigan), Mingyao Li (University of Pennsylvania), Christopher H. Newton-Cheh (Broad Institute, Massachusetts General Hospital, Harvard Medical School), Sandosh Padmanabhan (University of Glasgow School of Medicine), Gina Peloso (Broad Institute, Harvard Medical School, Massachusetts General Hospital), Sara Pulit (Broad Institute), Daniel J. Rader (University of Pennsylvania), David Reich (Broad Institute, Harvard Medical School), Muredach P. Reilly (University of Pennsylvania), Manuel A. Rivas (Broad Institute, Massachusetts General Hospital), Steve Schwartz (Fred Hutchinson Cancer Research Center), Laura Scott (University of Michigan), David S. Siscovick (University of Washington), John A. Spertus (University of Missouri Kansas City), Nathaniel O. Stitzel (Brigham and Women's Hospital), Nina Stoletzki (Brigham and Women's Hospital, Broad Institute, Harvard Medical School), Shamil R. Sunyaev (Brigham and Women's Hospital, Broad Institute, Harvard Medical School), Benjamin F. Voight (Broad Institute, Massachusetts General Hospital), Cristen J. Willer (University of Michigan)

### **HeartGO**

Stephen S. Rich (University of Virginia), Ermeg Akylbekova (Jackson State University, University of Mississippi Medical Center), Larry D. Atwood (Boston University), Christie M. Ballantyne (Baylor College of Medicine, Methodist DeBakey Heart Center), Maja Barbalic (University of Texas Health Science Center Houston), R. Graham Barr (Columbia University Medical Center), Emelia J. Benjamin (Boston University), Joshua Bis (University of Washington), Eric Boerwinkle (University of Texas Health Science Center Houston), Donald W. Bowden (Wake Forest University), Jennifer Brody (University of Washington), Matthew Budoff (Harbor-UCLA Medical Center), Greg Burke (Wake Forest University), Sarah Buxbaum (Jackson State University), Jeff Carr (Wake Forest University), Donna T. Chen (University of

Virginia), Ida Y. Chen (Cedars-Sinai Medical Center), Wei-Min Chen (University of Virginia), Pat Concannon (University of Virginia), Jacy Crosby (University of Texas Health Science Center Houston), L. Adrienne Cupples (Boston University), Ralph D'Agostino (Boston University), Anita L. DeStefano (Boston University), Albert Dreisbach (University of Mississippi Medical Center), Josée Dupuis (Boston University), J. Peter Durda (University of Vermont), Jaclyn Ellis (University of North Carolina Chapel Hill), Aaron R. Folsom (University of Minnesota), Myriam Fornage (University of Texas Health Science Center Houston), Caroline S. Fox (National Heart, Lung, and Blood Institute), Ervin Fox (University of Mississippi Medical Center), Vincent Funari (Cedars-Sinai Medical Center), Santhi K. Ganesh (University of Michigan), Julius Gardin (Hackensack University Medical Center), David Goff (Wake Forest University), Ora Gordon (Cedars-Sinai Medical Center), Wayne Grody (University of California Los Angeles), Myron Gross (University of Minnesota), Xiuqing Guo (Cedars-Sinai Medical Center), Ira M. Hall (University of Virginia), Nancy L. Heard-Costa (Boston University), Susan R. Heckbert (University of Washington), Nicholas Heintz (University of Vermont), David M. Herrington (Wake Forest University), DeMarc Hickson (Jackson State University, University of Mississippi Medical Center), Jie Huang (National Heart, Lung, and Blood Institute), Shih-Jen Hwang (Boston University, National Heart, Lung, and Blood Institute), David R. Jacobs (University of Minnesota), Nancy S. Jenny (University of Vermont), Andrew D. Johnson (National Heart, Lung, and Blood Institute), Craig W. Johnson (University of Washington), Steven Kawut (University of Pennsylvania), Richard Kronmal (University of Washington), Raluca Kurz (Cedars-Sinai Medical Center), Ethan M. Lange (University of North Carolina Chapel Hill), Leslie A. Lange (University of North Carolina Chapel Hill), Martin G. Larson (Boston University), Mark Lawson (University of Virginia), Cora E. Lewis (University of Alabama at Birmingham), Daniel Levy (National Heart, Lung, and Blood Institute), Dalin Li (Cedars-Sinai Medical Center), Honghuang Lin (Boston University), Chunyu Liu (National Heart, Lung, and Blood Institute), Jiankang Liu (University of Mississippi Medical Center), Kiang Liu (Northwestern University), Xiaoming Liu (University of Texas Health Science Center Houston), Yongmei Liu (Wake Forest University), William T. Longstreth (University of Washington), Cay Loria (National Heart, Lung, and Blood Institute), Thomas Lumley (University of Auckland), Kathryn Lunetta (Boston University), Aaron J. Mackey (University of Virginia), Rachel Mackey (University of Pittsburgh), Ani Manichaikul (University of Virginia), Taylor Maxwell (University of Texas Health Science Center Houston), Barbara McKnight (University of Washington), James B. Meigs (Brigham and Women's Hospital, Harvard Medical School, Massachusetts General Hospital), Alanna C. Morrison (University of Texas Health Science Center Houston), Solomon K. Musani (University of Mississippi Medical Center), Josyf C. Mychaleckyj (University of Virginia), Jennifer A. Nettleton (University of Texas Health Science Center Houston), Kari North (University of North Carolina Chapel Hill), Christopher J. O'Donnell (Massachusetts General Hospital, National Heart, Lung, and Blood Institute), Daniel O'Leary (Tufts University School of Medicine), Frank Ong (Cedars-Sinai Medical Center), Walter Palmas (Columbia University), James S. Pankow (University of Minnesota), Nathan D.

Pankratz (Indiana University School of Medicine), Shom Paul (University of Virginia), Marco Perez (Stanford University School of Medicine), Sharina D. Person (University of Alabama at Birmingham, University of Alabama at Tuscaloosa), Joseph Polak (Tufts University School of Medicine), Wendy S. Post (Johns Hopkins University), Bruce M. Psaty (Group Health Research Institute, University of Washington), Aaron R. Quinlan (University of Virginia), Leslie J. Raffel (Cedars-Sinai Medical Center), Vasani S. Ramachandran (Boston University), Alexander P. Reiner (Fred Hutchinson Cancer Research Center, University of Washington), Kenneth Rice (University of Washington), Jerome I. Rotter (Cedars-Sinai Medical Center), Jill P. Sanders (University of Vermont), Pamela Schreiner (University of Minnesota), Sudha Seshadri (Boston University), Steve Shea (Brigham and Women's Hospital, Harvard University), Stephen Sidney (Kaiser Permanente Division of Research, Oakland, CA), Kevin Silverstein (University of Minnesota), David S. Siscovick (University of Washington), Nicholas L. Smith (University of Washington), Nona Sotoodehnia (University of Washington), Asoke Srinivasan (Tougaloo College), Herman A. Taylor (Jackson State University, Tougaloo College, University of Mississippi Medical Center), Kent Taylor (Cedars-Sinai Medical Center), Fridtjof Thomas (University of Texas Health Science Center Houston), Russell P. Tracy (University of Vermont), Michael Y. Tsai (University of Minnesota), Kelly A. Volcik (University of Texas Health Science Center Houston), Christina L. Wassel (University of California San Diego), Karol Watson (University of California Los Angeles), Gina Wei (National Heart, Lung, and Blood Institute), Wendy White (Tougaloo College), Kerri L. Wiggins (University of Vermont), Jemma B. Wilk (Boston University), O. Dale Williams (Florida International University), Gregory Wilson (Jackson State University), James G. Wilson (University of Mississippi Medical Center), Phillip Wolf (Boston University), Neil A. Zakai (University of Vermont)

## **ISGS and SWISS**

John Hardy (Reta Lila Weston Research Laboratories, Institute of Neurology, University College London), James F. Meschia (Mayo Clinic), Michael Nalls (National Institute on Aging), Stephen S. Rich (University of Virginia), Andrew Singleton (National Institute on Aging), Brad Worrall (University of Virginia)

## **LungGO**

Michael J. Bamshad (Seattle Children's Hospital, University of Washington), Kathleen C. Barnes (Johns Hopkins University), Ibrahim Abdulhamid (Children's Hospital of Michigan), Frank Accurso (University of Colorado), Ran Anbar (Upstate Medical University), Terri Beaty (Johns Hopkins University), Abigail Bigham (University of Washington), Phillip Black (Children's Mercy Hospital), Eugene Bleecker (Wake Forest University), Kati Buckingham (University of Washington), Anne Marie Cairns (Maine Medical Center), Wei-Min Chen (University of

Virginia), Daniel Caplan (Emory University), Barbara Chatfield (University of Utah), Aaron Chidekel (A.I. Dupont Institute Medical Center), Michael Cho (Brigham and Women's Hospital, Harvard Medical School), David C. Christiani (Massachusetts General Hospital), James D. Crapo (National Jewish Health), Julia Crouch (Seattle Children's Hospital), Denise Daley (University of British Columbia), Anthony Dang (University of North Carolina Chapel Hill), Hong Dang (University of North Carolina Chapel Hill), Alicia De Paula (Ochsner Health System), Joan DeCelie-Germana (Schneider Children's Hospital), Allen Dozor (New York Medical College, Westchester Medical Center), Mitch Drumm (University of North Carolina Chapel Hill), Maynard Dyson (Cook Children's Med. Center), Julia Emerson (Seattle Children's Hospital, University of Washington), Mary J. Emond (University of Washington), Thomas Ferkol (St. Louis Children's Hospital, Washington University School of Medicine), Robert Fink (Children's Medical Center of Dayton), Cassandra Foster (Johns Hopkins University), Deborah Froh (University of Virginia), Li Gao (Johns Hopkins University), William Gershan (Children's Hospital of Wisconsin), Ronald L. Gibson (Seattle Children's Hospital, University of Washington), Elizabeth Godwin (University of North Carolina Chapel Hill), Magdalen Gondor (All Children's Hospital Cystic Fibrosis Center), Hector Gutierrez (University of Alabama at Birmingham), Nadia N. Hansel (Johns Hopkins University, Johns Hopkins University School of Public Health), Paul M. Hassoun (Johns Hopkins University), Peter Hiatt (Texas Children's Hospital), John E. Hokanson (University of Colorado), Michelle Howenstine (Indiana University, Riley Hospital for Children), Laura K. Hummer (Johns Hopkins University), Jamshed Kanga (University of Kentucky), Yoonhee Kim (National Human Genome Research Institute), Michael R. Knowles (University of North Carolina Chapel Hill), Michael Konstan (Rainbow Babies & Children's Hospital), Thomas Lahiri (Vermont Children's Hospital at Fletcher Allen Health Care), Nan Laird (Harvard School of Public Health), Christoph Lange (Harvard School of Public Health), Lin Lin (Harvard Medical School), Xihong Lin (Harvard School of Public Health), Tin L. Louie (University of Washington), David Lynch (National Jewish Health), Barry Make (National Jewish Health), Thomas R. Martin (University of Washington, VA Puget Sound Medical Center), Steve C. Mathai (Johns Hopkins University), Rasika A. Mathias (Johns Hopkins University), John McNamara (Children's Hospitals and Clinics of Minnesota), Sharon McNamara (Seattle Children's Hospital), Deborah Meyers (Wake Forest University), Susan Millard (DeVos Children's Butterworth Hospital, Spectrum Health Systems), Peter Mogayzel (Johns Hopkins University), Richard Moss (Stanford University), Tanda Murray (Johns Hopkins University), Dennis Nielson (University of California at San Francisco), Blakeslee Noyes (Cardinal Glennon Children's Hospital), Wanda O'Neal (University of North Carolina Chapel Hill), David Orenstein (Children's Hospital of Pittsburgh), Brian O'Sullivan (University of Massachusetts Memorial Health Care), Rhonda Pace (University of North Carolina Chapel Hill), Peter Pare (St. Paul's Hospital), H. Worth Parker (Dartmouth-Hitchcock Medical Center, New Hampshire Cystic Fibrosis Center), Mary Ann Passero (Rhode Island Hospital), Elizabeth Perkett (Vanderbilt University), Adrienne Prestridge (Children's Memorial Hospital), Nicholas M. Rafaels (Johns Hopkins University), Bonnie Ramsey (Seattle

Children's Hospital, University of Washington), Elizabeth Regan (National Jewish Health), Clement Ren (University of Rochester), George Retsch-Bogart (University of North Carolina Chapel Hill), Michael Rock (University of Wisconsin Hospital and Clinics), Antony Rosen (Johns Hopkins University), Margaret Rosenfeld (Seattle Children's Hospital, University of Washington), Ingo Ruczinski (Johns Hopkins University School of Public Health), Andrew Sanford (University of British Columbia), David Schaeffer (Nemours Children's Clinic), Cindy Sell (University of North Carolina Chapel Hill), Daniel Sheehan (Children's Hospital of Buffalo), Edwin K. Silverman (Brigham and Women's Hospital, Harvard Medical School), Don Sin (Children's Medical Center of Dayton), Terry Spencer (Elliot Health System), Jackie Stonebraker (University of North Carolina Chapel Hill), Holly K. Tabor (Seattle Children's Hospital, University of Washington), Laurie Varlotta (St. Christopher's Hospital for Children), Candelaria I. Vergara (Johns Hopkins University), Robert Weiss, Fred Wigley (Johns Hopkins University), Robert A. Wise (Johns Hopkins University), Fred A. Wright (University of North Carolina Chapel Hill), Mark M. Wurfel (University of Washington), Robert Zanni (Monmouth Medical Center), Fei Zou (University of North Carolina Chapel Hill)

## **SeattleGO**

Deborah A. Nickerson (University of Washington), Mark J. Rieder (University of Washington), Phil Green (University of Washington), Jay Shendure (University of Washington), Joshua M. Akey (University of Washington), Michael J. Bamshad (Seattle Children's Hospital, University of Washington), Carlos D. Bustamante (Stanford University School of Medicine), David R. Crosslin (University of Washington), Evan E. Eichler (University of Washington), P. Keolu Fox, Adam Gordon (University of Washington), Simon Gravel (Stanford University School of Medicine), Gail P. Jarvik (University of Washington), Jill M. Johnsen (Puget Sound Blood Center, University of Washington), Mengyuan Kan (Baylor College of Medicine), Eimear E. Kenny (Stanford University School of Medicine), Jeffrey M. Kidd (Stanford University School of Medicine), Fremiet Lara-Garduno (Baylor College of Medicine), Suzanne M. Leal (Baylor College of Medicine), Dajiang J. Liu (Baylor College of Medicine), Sean McGee (University of Washington), Bryan Paepfer (University of Washington), Peggy D. Robertson (University of Washington), Joshua D. Smith (University of Washington), Emily H. Turner (University of Washington), Gao Wang (Baylor College of Medicine),,

## **WHISP**

Rebecca Jackson (Ohio State University), Kari North (University of North Carolina Chapel Hill), Ulrike Peters (Fred Hutchinson Cancer Research Center), Christopher S. Carlson (Fred Hutchinson Cancer Research Center, University of Washington), Garnet Anderson (Fred Hutchinson Cancer Research Center), Hoda Anton-Culver (University of California at Irvine),

Themistocles L. Assimes (Stanford University School of Medicine), Paul L. Auer (Fred Hutchinson Cancer Research Center), Shirley Beresford (Fred Hutchinson Cancer Research Center), Chris Bizon (University of North Carolina Chapel Hill), Henry Black (Rush Medical Center), Robert Brunner (University of Nevada), Robert Brzyski (University of Texas Health Science Center San Antonio), Dale Burwen (National Heart, Lung, and Blood Institute WHI Project Office), Bette Caan (Kaiser Permanente Division of Research, Oakland, CA), Cara L. Carty (Fred Hutchinson Cancer Research Center), Rowan Chlebowski (Los Angeles Biomedical Research Institute), Steven Cummings (University of California at San Francisco), J. David Curb\* (University of Hawaii), Charles B. Eaton (Brown University, Memorial Hospital of Rhode Island), Leslie Ford (National Heart, Lung, and Blood Institute, National Heart, Lung, and Blood Institute WHI Project Office), Nora Franceschini (University of North Carolina Chapel Hill), Stephanie M. Fullerton (University of Washington), Margery Gass (University of Cincinnati), Nancy Geller (National Heart, Lung, and Blood Institute WHI Project Office), Gerardo Heiss (University of North Carolina Chapel Hill), Barbara V. Howard (Howard University, MedStar Research Institute), Li Hsu (Fred Hutchinson Cancer Research Center), Carolyn M. Hutter (Fred Hutchinson Cancer Research Center), John Ioannidis (Stanford University School of Medicine), Shuo Jiao (Fred Hutchinson Cancer Research Center), Karen C. Johnson (University of Tennessee Health Science Center), Charles Kooperberg (Fred Hutchinson Cancer Research Center), Lewis Kuller (University of Pittsburgh), Andrea LaCroix (Fred Hutchinson Cancer Research Center), Kamakshi Lakshminarayan (University of Minnesota), Dorothy Lane (State University of New York at Stony Brook), Ethan M. Lange (University of North Carolina Chapel Hill), Leslie A. Lange (University of North Carolina Chapel Hill), Norman Lasser (University of Medicine and Dentistry of New Jersey), Erin LeBlanc (Kaiser Permanente Center for Health Research, Portland, OR), Cora E. Lewis (University of Alabama at Birmingham), Kuo-Ping Li (University of North Carolina Chapel Hill), Marian Limacher (University of Florida), Dan-Yu Lin (University of North Carolina Chapel Hill), Benjamin A. Logsdon (Fred Hutchinson Cancer Research Center), Shari Ludlam (National Heart, Lung, and Blood Institute WHI Project Office), JoAnn E. Manson (Brigham and Women's Hospital, Harvard School of Public Health), Karen Margolis (University of Minnesota), Lisa Martin (George Washington University Medical Center), Joan McGowan (National Heart, Lung, and Blood Institute WHI Project Office), Keri L. Monda (Amgen, Inc.), Jane Morley Kotchen (Medical College of Wisconsin), Lauren Nathan (University of California Los Angeles), Judith Ockene (Fallon Clinic, University of Massachusetts), Mary Jo O'Sullivan (University of Miami), Lawrence S. Phillips (Emory University), Ross L. Prentice (Fred Hutchinson Cancer Research Center), Alexander P. Reiner (Fred Hutchinson Cancer Research Center, University of Washington), John Robbins (University of California at Davis), Jennifer G. Robinson (University of Iowa), Jacques E. Rossouw (National Heart, Lung, and Blood Institute, National Heart, Lung, and Blood Institute WHI Project Office), Haleh Sangi-Haghpeykar (Baylor College of Medicine), Gloria E. Sarto (University of Wisconsin), Sally Shumaker (Wake Forest University), Michael S. Simon (Wayne State University), Marcia L. Stefanick (Stanford University School of Medicine), Evan Stein

(Medical Research Labs), Hua Tang (Stanford University), Kira C. Taylor (University of Louisville), Cynthia A. Thomson (University of Arizona), Timothy A. Thornton (University of Washington), Linda Van Horn (Northwestern University), Mara Vitolins (Wake Forest University), Jean Wactawski-Wende (University of Buffalo), Robert Wallace (University of Iowa), Sylvia Wassertheil-Smoller (Boston University), Donglin Zeng (University of North Carolina Chapel Hill),

### **NHLBI GO ESP Project Team**

Deborah Applebaum-Bowden (National Heart, Lung, and Blood Institute), Michael Feolo (National Center for Biotechnology Information), Weiniu Gan (National Heart, Lung, and Blood Institute), Dina N. Paltoo (National Heart, Lung, and Blood Institute), Jacques E. Rossouw (National Heart, Lung, and Blood Institute, National Heart, Lung, and Blood Institute WHI Project Office), Phyliss Sholinsky (National Heart, Lung, and Blood Institute), Anne Sturcke (National Center for Biotechnology Information)

\*deceased

### **ESP Groups**

Anthropometry Project Team, Blood Count/Hematology Project Team, Blood Pressure Project Team, Data Flow Working Group, Early MI Project Team, ELSI Working Group, Executive Committee, Family Study Project Team, Lipids Project Team, Lung Project Team, Personal Genomics Project Team, Phenotype and Harmonization Working Group, Population Genetics and Statistical Analysis Working Group, Publications and Presentations Working Group, Quantitative Analysis Ad Hoc Task Group, Sequencing and Genotyping Working Group, Steering Committee, Stroke Project Team, Structural Variation Working Group, Subclinical/Quantitative Project Team

### **ESP Cohorts**

Acute Lung Injury (ALI), Atherosclerosis Risk in Communities (ARIC), Cardiovascular Health Study (CHS), Chronic Obstructive Pulmonary Disease (COPDGene), Coronary Artery Risk Development in Young Adults (CARDIA), Cystic Fibrosis (CF), Early Pseudomonas Infection Control (EPIC), Framingham Heart Study (FHS), Jackson Heart Study (JHS), Lung Health Study (LHS), Multi-Ethnic Study of Atherosclerosis (MESA), Pulmonary Arterial Hypertension (PAH), Severe Asthma Research Program (SARP), Women's Health Initiative (WHI)



## Supplementary note

### Family Recruitment, Characterization, and Sample Collection

For the Houston cohort, the study protocol was approved by the Committee for the Protection of Human Subjects at the University of Texas Health Science Center at Houston, and the study participants gave informed consent to participate in these studies. Families with two or more members affected with TAAD were enrolled into the study. Phenotypic characterization of vascular diseases, including TAAD and ICAs, was previously described<sup>1</sup>. Specifically in this paper, individuals with aortic root measurements and Z scores over 2.0 were scored as positive<sup>2</sup>. Blood or saliva samples were obtained from affected individuals and family members. Surgical aortic and/or skin biopsy tissue were also obtained from affected members when possible. Medical records, including imaging studies of the aorta and cerebral vessels, surgical reports, hospital records, and physicians' notes, were reviewed. Phenotypic features beyond the vascular system, including features of Marfan syndrome and Loeys-Dietz syndrome, were assessed in *TGFB2* mutation carriers examined by a clinical geneticist (DMM)<sup>3,4</sup>. Tissue was harvested and SMCs explanted as previously described<sup>5,6</sup>. Control aortic tissue was obtained from the International Institute for the Advancement of Medicine from individuals who died of non-vascular disease and age- and gender-matched to the patients as closely as possible (n = 2).

French probands and families were recruited through the National Reference Center for Marfan syndrome and related disorders and through related centers nationwide. All patients were screened for diagnosis of possible syndromic (notably MFS) or non syndromic TAAD through a multidisciplinary clinic including systematic slit-lamp examination and extensive imaging. Blood samples were obtained from patients in agreement with the French Bioethic laws and genomic DNA prepared as previously reported<sup>7</sup>.

## References

1. Regalado,E.S. *et al.* Exome Sequencing Identifies SMAD3 Mutations as a Cause of Familial Thoracic Aortic Aneurysm and Dissection With Intracranial and Other Arterial Aneurysms. *Circ. Res.* **109**, 680-686 (2011).
2. Roman,M.J., Devereux,R.B., Kramer-Fox,R., & O'Loughlin,J. Two-dimensional echocardiographic aortic root dimensions in normal children and adults. *Am. J. Cardiol.* **64**, 507-512 (1989).
3. Loeys,B.L. *et al.* The revised Ghent nosology for the Marfan syndrome. *J. Med. Genet.* **47**, 476-485 (2010).
4. Loeys,B.L. *et al.* Aneurysm syndromes caused by mutations in the TGF-beta receptor. *N. Engl. J Med.* **355**, 788-798 (2006).
5. He,R. *et al.* Characterization of the inflammatory and apoptotic cells in the aortas of patients with ascending thoracic aortic aneurysms and dissections. *J. Thorac. Cardiovasc. Surg.* **131**, 671-678 (2006).
6. Inamoto,S. *et al.* TGFBR2 Mutations Alter Smooth Muscle Cell Phenotype and Predispose to Thoracic Aortic Aneurysms and Dissections. *Cardiovasc. Res.* **88**, 520-529 (2010).
7. Mizuguchi,T. *et al.* Heterozygous TGFBR2 mutations in Marfan syndrome. *Nat. Genet.* **36**, 855-860 (2004).

**Supplementary Table 1 Rare nonsynonymous, nonsense, and indel variants identified by exome sequencing that are segregated with diseases in families**

| Gene    | Location        | TAA family ID | Nucleotide change | aminoAcids                    | polyPhen          | Present in controls <sup>a</sup> |
|---------|-----------------|---------------|-------------------|-------------------------------|-------------------|----------------------------------|
| TGFB2   | chr1:218610772  | TAA288        | GTACAA/G          | p.Tyr341Cysfs*25 <sup>d</sup> | NA                | 0/3795 <sup>b</sup>              |
| FAM5C   | chr1:190068100  | TAA288        | A/G               | Leu450Pro                     | benign            | 0/1525                           |
| DISP1   | chr1:223177116  | TAA288        | G/A               | Val793Met                     | probably-damaging | 1/1536                           |
| ZNF488  | chr10:48370770  | TAA288        | C/G               | Pro80Ala                      | probably-damaging | 0/1329                           |
| COL4A2  | chr13:111156311 | TAA288        | T/C               | Met1419Thr                    | probably-damaging | 3/1157                           |
| UIMC1   | chr5:176332446  | TAA288        | T/G               | Gln666Pro                     | probably-damaging | 3/1537                           |
| BDP1    | chr5:70798515   | TAA288        | C/T               | Pro713Leu                     | probably-damaging | 1/1537                           |
| GPT     | chr8:145730072  | TAA288        | G/A               | Arg83His                      | probably-damaging | 0/1534                           |
| STK32A  | chr5:146741152  | TAA288        | C/T               | Thr212Met                     | possibly-damaging | 0/1529                           |
| LPIN2   | chr18:2922148   | TAA288        | C/T               | Asp742Asn                     | possibly damaging | 0/1490                           |
| COL4A2  | chr13:111121570 | TAA288        | A/G               | Lys701Arg                     | benign            | 3/1537                           |
| DGCR8   | chr22:20073742  | TAA288        | C/A               | Leu86Ile                      | benign            | 2/1537                           |
| NIPAL4  | chr5:156899672  | TAA288        | G/A               | Val369Ile                     | benign            | 1/1537                           |
| FAM83H  | chr8:144812521  | TAA288        | G/A               | Pro78Ser                      | benign            | 0/1537                           |
| CABYR   | chr18:21736772  | TAA288        | C/G               | Ser436Cys                     | NA                | 1/1535                           |
| DYTN    | chr2:207527977  | TAA288        | T/TCC             | p.Glu428Glyfs*59              | NA                | 7/1537                           |
| TGFB2   | chr1:218607723  | MS239         | C/A               | C229X                         | NA                | 0/10750 (EVS) <sup>c</sup>       |
| PARP4   | chr13:25021200  | MS239         | C/T               | L1080F                        | benign            | 0/10752 (EVS)                    |
| USP32   | chr17:58288396  | MS239         | A/G               | N801S                         | benign            | 680/10680 (EVS)                  |
| NBPF10  | chr1:145298168  | MS239         | A/G               | A194T                         | possibly damaging | 0/3230 (EVS)                     |
| TMEM206 | chr1:212560248  | MS239         | C/T               | R171C                         | possibly damaging | 15/10758 (EVS)                   |

<sup>a</sup>Rare variants present in the number of control chromosomes. <sup>b</sup>Control data were obtained from in-house 1500 exome data set. <sup>c</sup>Control data were obtained from the EVS database (<http://evs.gs.washington.edu/EVS/>). <sup>d</sup> the only exome rare variant identified in family TAA288 that segregated with thoracic aortic aneurysms and aortic dissections when additional affected family members were assessed.

**Supplementary Table 2 Primers used for *TGFB2* sequencing and mRNA quantification**

| Primers               | Primer sequence (5' → 3')             |
|-----------------------|---------------------------------------|
| RT-PCR forward primer | TCGAGGACCTGACACGAGGGTGGAAATGGATACACGA |
| RT-PCR reward primer  | GGAGAAGCAGATGCTTCTGG                  |
| Exon 1 forward primer | CCAAACAACCTCTCCTTGATCTA               |
| Exon 2 forward primer | CCCTTATGGTTTCTTGGGAT                  |
| Exon 3 forward primer | GTGACCATGCAATTGAGATG                  |
| Exon 4 forward primer | GAATGGCTTCACCATAAAGG                  |
| Exon 5 forward primer | CAGCTGATGCTGCTTTGGTG                  |
| Exon 6 forward primer | CACTTGAGATTACAATAAAGCC                |
| Exon 7 forward primer | GCCTACTCAGTGCTGTGAC                   |
| Exon 1 reward primer  | AAGGGCGATCCCGGGAGCTG                  |
| Exon 2 reward primer  | GTTCAAGGTTGCAGTGAGCT                  |
| Exon 3 reward primer  | CAAGTTTTGGTTACCTGC                    |
| Exon 4 reward primer  | CAACCATATCACTGTCCAAATG                |
| Exon 5 reward primer  | TGCACTCTATCTGGCCTT                    |
| Exon 6 reward primer  | CCAGTACCCATACATGTG                    |
| Exon 7 reward primer  | ACTGATGAACCAAGGCTCT                   |

**Supplementary Table 3 Clinical data of individuals with *TGFB2* mutations**

| Features                     | TAA288 |       |       |       |         |          |          |        |      |      |      | MS239  |      |       |       |       |      | MS1758 | MS211  |
|------------------------------|--------|-------|-------|-------|---------|----------|----------|--------|------|------|------|--------|------|-------|-------|-------|------|--------|--------|
|                              | III:2  | III:3 | III:4 | III:5 | III:8   | III:9    | III:11   | III:12 | IV:1 | IV:2 | IV:3 | III:16 | IV:2 | IV:12 | IV:20 | IV:22 | V:5  | II:8   | III:14 |
| Sex                          | F      | M     | F     | M     | F       | M        | M        | M      | M    | M    | M    | M      | M    | F     | F     | M     | M    | M      | M      |
| Age (years)                  | 50     | d.41  | 46    | 47    | 32      | 43       | 42       | 39     | 22   | 18   | 10   | 59     | 56   | 41    | 39    | 27    | 17   | 50     | 33     |
| Ht (cm)                      | 178    | 191   | 168   | 173   | 173     | 198      | 190      | 201    | 180  | 185  | 157  | 182    | 190  | 182   | 175   | 179   | 187  | 165    | 179    |
| Wt (kg)                      | 64     | 84    | 105   | 71    | 55      | 122      | 94       | 89     | 67   | 73   | 44   | 84     | 90   | 82    | 57    | 60    | 89   | 60     | 75     |
| Age at diagnosis (years)     |        | 41    |       | 40    | 25      | 36       | 35       | 32     | 18   | 17   | 5    | 53     | 45   | 36    | 32    | 27    |      | 47     | 31     |
| Age at surgery (years)       |        |       |       |       |         |          | 35       |        |      |      |      | 60     | 43   |       |       |       |      | 47     | 31     |
| Reason for surgery           |        |       |       |       |         |          | TAA      |        |      |      |      | TAA    | MVP  |       |       |       |      | TAD    | TAD    |
| Annulus (cm)                 | .      | .     | NI*   | .     | .       | .        | .        | .      | .    | .    | .    | 2.6    | 2.8  | 2.5   | 2.2   | 2.4   | 2.4  |        |        |
| Valsalva (cm)                | 2.6    | 8*    | NI*   | 4.7   | 3.4-3.5 | 4.7 (CT) | 5.4 (CT) | 4.1    | 4.1  | 3.4  | 2.9  | 5      | 4.8  | 4.1   | 4.6   | 3.6   | 3.7  |        |        |
| Sinotubular junction (cm)    | .      | .     | NI*   | .     | .       | .        | .        | .      | .    | .    | 2.0  | 3.4    | 3.5  | 3.2   | 2.6   | 2.6   | 3    |        |        |
| Ascending aorta (cm)         | .      | .     | NI*   | .     | .       | .        | .        | .      | .    | .    | 1.7  | 3.5    | 3.5  | 3.2   | 2.3   | 2.5   | 2.8  |        |        |
| Z score, sinuses of Valsalva | .      | .     | .     | .     | 2.7     | .        | .        | .      | 5.1  | 2.4  | 2.1  | 4.2    | 3.4  | 2.24  | 7.2   | 2.75  | 1.3  |        |        |
| LVEDD (cm)                   | .      | .     | .     | .     | .       | .        | .        | .      | .    | .    | .    | 5.7    | 5.4  | 6.0   | 4.7   | 5.0   | 6.1  | 4.9    | 5.9    |
| Arterial tortuosity          | .      | .     | .     | .     | no      | .        | .        | .      | .    | .    | .    | yes    | yes  | .     | .     | .     | .    | yes    | no     |
| Intracranial aneurysm        | no     | .     | no    | .     | no      | .        | .        | .      | no   | no   | .    | no     | no.  | .     | .     | .     | .    | .      | .      |
| Other cardiac disease        |        | DCM   |       |       |         |          |          |        | MVP  | MVP  |      |        | MVP  |       |       |       |      |        |        |
| Pectus deformity             | no     | .     | .     | .     | no      | no       | mild     | mild   | no   | no   | mild | mild   | yes  | no    | yes   | no    | no   | yes    | no     |
| Arm span to height ratio     | 0.93   | .     | .     | .     | 1.02    | .        | 1.03     | .      | 0.94 | 1.02 | 0.99 | 1.02   | 1.07 | 1.04  | 0.96  | 1.01  | 1.01 | 1.04   | 1.02   |
| Wrist sign                   | no     | .     | .     | .     | yes     | .        | yes      | .      | no   | no   | .    | no     | no   | yes   | yes   | no    | no   | yes    | yes    |
| Thumb sign                   | no     | .     | .     | .     | no      | .        | yes      | .      | no   | yes  | .    | no     | yes  | yes   | yes   | no    | no   | yes    | yes    |
| Spondylolisthesis            | .      | .     | .     | .     | .       | .        | .        | .      | .    | .    | .    | no     | yes  | no    | no    | no    | no   | no     | .      |
| Scoliosis                    | yes    | .     | .     | .     | yes     | .        | no       | no     | mild | no   | no   | no     | no   | mild  | no    | no    | no   | no     | no     |
| Flat feet                    | yes    | .     | .     | .     | no      | .        | yes      | yes    | yes  | yes  | no   | yes    | yes  | no    | yes   | yes   | yes  | yes    | no     |
| Protrusio acetabularis       | .      | .     | .     | .     | .       | .        | .        | .      | .    | .    | .    | no     | yes  | no    | no    | no    | no   | no     | no     |
| Joint hyperflexibility       | yes    | .     | .     | .     | yes     | .        | no       | yes    | yes  | yes  | no   | no     | no   | yes   | yes   | no    | yes  | yes    | yes    |
| High arched palate           | yes    | .     | .     | .     | yes     | .        | no       | yes    | yes  | yes  | yes  | yes    | yes  | no    | yes   | no    | no   | no     | no     |
| Striae atrophicae            | no     | .     | .     | .     | no      | .        | yes      | yes    | yes  | yes  | no   | yes    | yes  | no    | no    | yes   | yes  | no     | no     |

|                                  |    |     |   |     |    |    |     |    |     |     |    |     |     |     |     |    |     |                    |     |     |
|----------------------------------|----|-----|---|-----|----|----|-----|----|-----|-----|----|-----|-----|-----|-----|----|-----|--------------------|-----|-----|
| Operated hernia                  | no | yes | . | yes | no | .  | yes | no | yes | no  | no | no  | no  | yes | no  | no | no  | no                 | no  | yes |
| Cutis laxa                       | no |     |   |     | no |    |     |    | no  | no  | no | no  | no  | no  | no  | no | no  | no                 | no  | no  |
| Pneumothorax                     | no | .   | . | no  | no | no | no  | no | no  | no  | no | no  | no  | yes | no  | no | no  | no                 | no  | no  |
| Dural ectasia                    | .  | .   | . | .   | .  | .  | .   | .  | .   | .   | .  | .   | no  | yes | yes | .  | no  | .                  | yes | .   |
| Emphysema                        | no | no  | . | no  | no | no | no  | no | no  | no  | no | no  | yes | .   | .   | .  | .   | yes                | .   |     |
| Phlebitis                        | no | no  | . | no  | no | no | no  | no | no  | no  | no | yes | yes | no  | no  | no | no  | no                 | no  | no  |
| Lens dislocation                 | no | .   | . | .   | no | .  | .   | .  | no  | no  | no | no  | no  | no  | no  | no | no  | minor <sup>†</sup> | no  | no  |
| Flat cornea                      | .  | .   | . | .   | .  | .  | .   | .  | .   | .   | .  | no  | yes | no  | no  | no | yes | no                 | no  |     |
| Dolichocephaly                   | no | .   | . | .   | no | .  | .   | .  | no  | no  | no | no  | no  | no  | no  | no | no  | no                 | no  | no  |
| Malar hypoplasia                 | no | .   | . | .   | no | .  | .   | .  | no  | no  | no | no  | no  | no  | no  | no | no  | no                 | no  | no  |
| Down-slanting palpebral fissures | no | .   | . | .   | no | .  | .   | .  | no  | no  | no | no  | no  | no  | no  | no | no  | no                 | no  | no  |
| Retrognathia                     | no | .   | . | .   | no | .  | .   | .  | no  | yes | no | no  | no  | yes | no  | no | no  | no                 | no  | no  |
| Enophthalmos                     | no | .   | . | .   | no | .  | .   | .  | no  | no  | no | no  | no  | no  | no  | no | no  | no                 | no  | no  |
| Hypertelorism                    | no | .   | . | .   | no | .  | .   | .  | no  | no  | no | no  | no  | no  | no  | no | no  | no                 | no  | no  |
| Cleft palate or abnormal uvula   | no | .   | . | .   | no | .  | .   | .  | no  | no  | no | no  | no  | no  | no  | no | no  | no                 | no  | no  |
| Craniosynostosis                 | no | .   | . | .   | no | .  | .   | .  | no  | no  | no | no  | no  | no  | no  | no | no  | no                 | no  | no  |

Ht : height; Wt: weight; TAA: thoracic aortic aneurysm; TAD: thoracic aortic dissection; “. ” : data not available; “\*” : verbal report; blank: not applicable; NI : normal; aortic measurements were obtained by echocardiography unless otherwise noted; MR: obtained by MR imaging; CT: obtained by CT imaging;; DCM: dilated cardiomyopathy; MVP: mitral valve prolapse; <sup>†</sup>individual noted as having minor ectopia lentis by French ophthalmologists, which is not recognized as lens dislocation in the USA.

Supplementary Figure 1

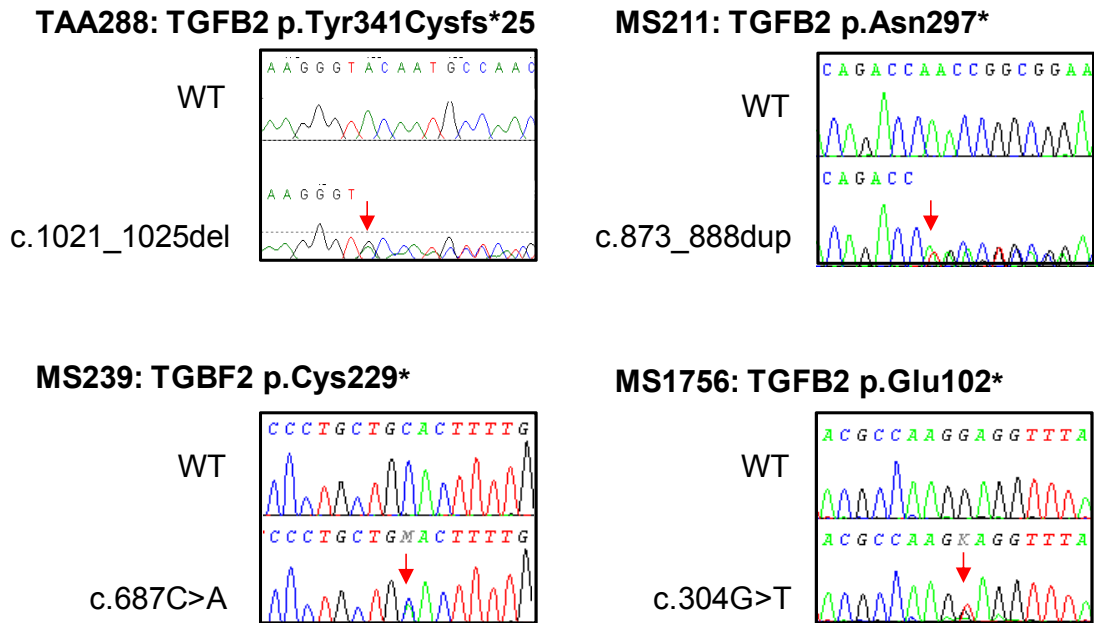

**Supplementary Figure 1.** Sequencing chromatograms showing the *TGFB2* mutations identified in the four families that all result in a premature termination codon (two missense mutations and a frameshift deletion and duplication).

Supplementary Figure 2

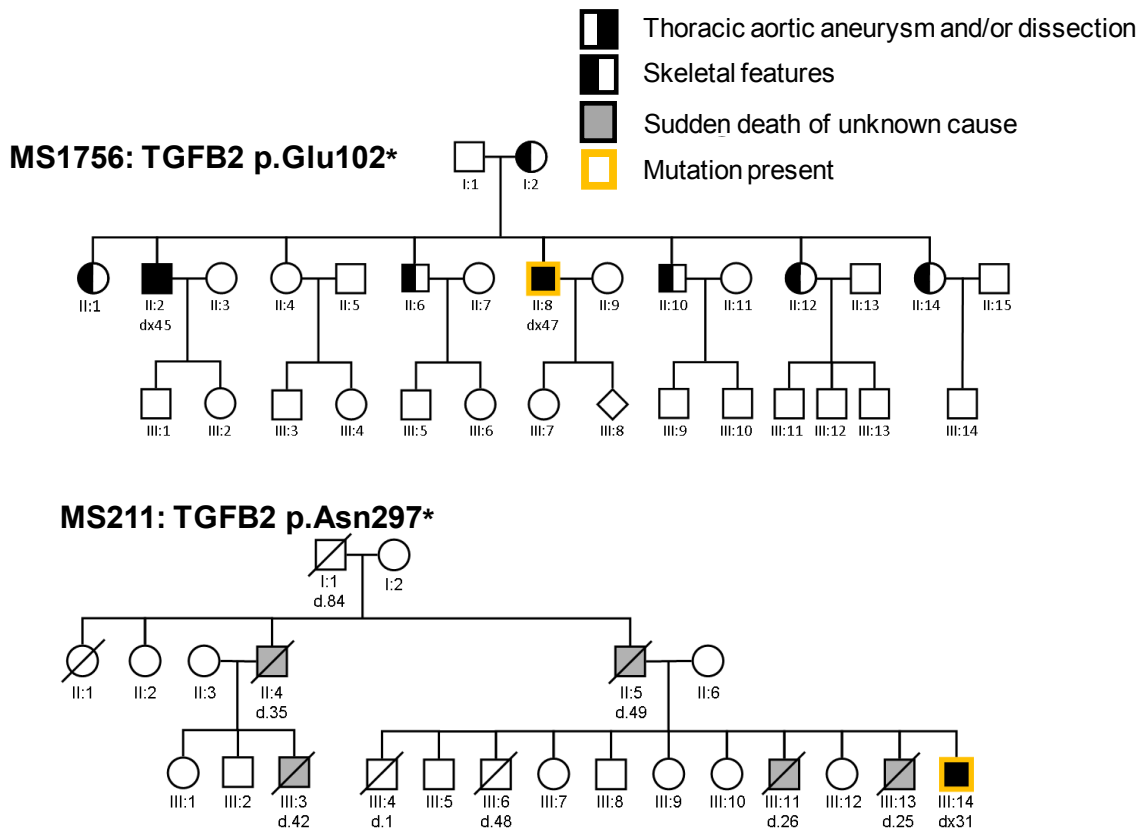

**Supplementary Figure 2.** Pedigrees of the two additional families with *TGFB2* mutations p.Asn297\* (MS1756) and p.Glu102\* (MS211) identified in the probands. Black-filled symbols indicate a finding of aortic root aneurysm and/or dissection, gray-filled symbols indicate sudden death due to an unknown cause, and half-filled symbols indicate individuals with skeletal features. Open symbols indicate individuals with a normal or unknown phenotype. The age at diagnosis of aortic root enlargement and/or dissection (“dx”) is shown in years and “d” indicates the age at death.



Supplementary Figure 3

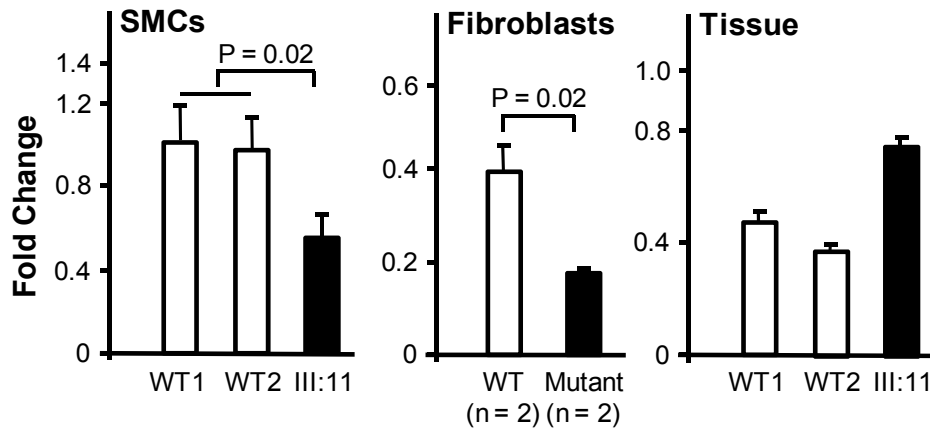

**Supplementary Figure 3.** Densitometry analysis of immunoblots for the TGF- $\beta$ 2 proprotein shown in the Figure 2c and 3c. Quantification of the immunoblots confirms decreased accumulation of TGF- $\beta$ 2 proprotein in cultured SMCs and fibroblasts, but increased expression of TGF- $\beta$ 2 proprotein in whole aortic tissue. P values represent statistical differences calculated from quantification of multiple immunoblots.
